# Supplementary material for: Rapid functional impairment of natural killer cells following tumor entry limits anti-tumor immunity
Source: PubMed Central journal article supplement (PMC10808449; doi:10.1038/s41467-024-44789-z), 2024-01-24
Supplement: 41467_2024_44789_MOESM4_ESM.pdf [file 41467_2024_44789_MOESM4_ESM.pdf]

## Description of Additional Supplementary Files

**Supplementary Data 1.** DEGs between *Itgam*-expressing and *Itga1*-expressing tumor NK cells in murine MC38 tumours and human CRC
